# Supplementary material for: Transcriptomic Analysis of Extracellular Vesicles in the Search for Novel Plasma and Thrombus Biomarkers of Ischemic Stroke Etiologies
Source: MDPI journal article supplement (doi:10.3390/ijms25084379), 2024-04-16
Supplement: s1 [file s1]

## Supplemental data

**Table S1:** Demographic and clinical characteristics of patients with IS included in the transcriptomic analysis of plasma EVs (n=21)

| Patient's characteristics  | All patients<br>n=21 | AT<br>n=6       | CE<br>n=10      | ESUS<br>n=5     | P     |
|----------------------------|----------------------|-----------------|-----------------|-----------------|-------|
| <i>Risk factors n(%)</i>   |                      |                 |                 |                 |       |
| Age, years                 | 76.0(65.5-82.5)      | 78.5(65.7-80.0) | 74.5(63.0-82.9) | 70.0(64.0-83.0) | 0.92  |
| Sex, female                | 10(47.6)             | 1(16.6)         | 7(70)           | 2(40)           | 0.10  |
| Smoking                    | 2(15.3)              | 0(0.0)          | 1(11.1)         | 1(25)           | 0.45  |
| Dyslipidemia               | 11(52.3)             | 5(83.3)         | 2(20)           | 4(80)           | 0.01  |
| Hypertension               | 13(61.9)             | 6(100)          | 4(40)           | 3(60)           | 0.05  |
| Diabetes                   | 2(9.5)               | 2(33.3)         | 0(0.0)          | 0(0.0)          | 0.06  |
| Atrial fibrillation        | 10(47.6)             | 1(16.7)         | 9(90.0)         | 0(0.0)          | 0.001 |
| Previous IS                | 2(9.5)               | 1(16.6)         | 1(10.0)         | 0(0.0)          | 0.64  |
| <i>Therapies n(%)</i>      |                      |                 |                 |                 |       |
| Antiplatelet therapy       | 4(19.0)              | 3(50)           | 0(0.0)          | 1(20.0)         | 0.04  |
| Anticoagulant therapy      | 4(19.0)              | 0(0.0)          | 3(30.0)         | 1(20.0)         | 0.33  |
| Statins                    | 10(47.6)             | 5(83.3)         | 1(10.0)         | 4(80.0)         | 0.004 |
| Fibrinolytic therapy (tPA) | 12(57)               | 3(50.0)         | 5(50.0)         | 4(80.0)         | 0.49  |
| Successful recanalization  | 20(95.2)             | 5(83.3)         | 10(100.0)       | 5(100.0)        | 0.23  |

| <i>Baseline NIHSS n(%)</i>        |          |         |         |         |      |
|-----------------------------------|----------|---------|---------|---------|------|
| Moderate (7-14)                   | 8(38.0)  | 3(50.0) | 4(40.0) | 1(20.0) | 0.58 |
| Severe (>14)                      | 13(62.0) | 3(50.0) | 6(60.0) | 4(80.0) | 0.58 |
| <i>Three-months outcomes n(%)</i> |          |         |         |         |      |
| Functional independence           | 9(42.8)  | 2(33.3) | 5(50.0) | 2(40.0) | 0.49 |
| 3-month mortality                 | 5(23.8)  | 3(50.0) | 1(10.0) | 1(20.0) | 0.11 |

Continuous data presented as median (IQR). Categorical data are presented as number (percentage). The comparisons were performed using Person chi-square for categorical variables, and Kruskal-Wallis for quantitative variables). AT=atherothrombotic; CE=Cardioembolic; ESUS=Embolic Stroke from Undetermined source; IS=Ischemic stroke.

**Table S2:** Differentially expressed genes (DEG) after the transcriptomic analysis of circulating EVs of IS patients (AT n=4-6, CE n=6-10, ESUS n=4-5).

| ENSEMBL ID          | NAME     | FOLD<br>CHANGE | AVEEXPR<br>(LOG2CPM) | p<br>(LIMMA<br>VOOM) |
|---------------------|----------|----------------|----------------------|----------------------|
| AT vs others (n=14) |          |                |                      |                      |
| ENSG00000130202.10  | NECTIN-2 | 4.2            | 2.6                  | 0.001                |
| CE vs others (n=21) |          |                |                      |                      |
| ENSG00000115457.10  | IGFBP-2  | 2.3            | 2.0                  | 0.01                 |
| ENSG00000261371.6   | PECAM-1  | 2.3            | 3.9                  | 0.01                 |

Fold change between the different contrasts are shown (AT vs. others, and CE vs others), as well as the average gene expression in all the samples (AveExpr, Log2CPM)

**Table S3:** Association of NECTIN-2 and IGFBP-2 circulating levels with clinical characteristics and outcome in patients with IS.

| Patient's characteristics  | NECTIN-2 (ng/mL) |              |      | IGFBP-2 (ng/mL)    |                     |      |
|----------------------------|------------------|--------------|------|--------------------|---------------------|------|
|                            | n=90             |              |      | n=81               |                     |      |
|                            | No               | Yes          | p    | No                 | Yes                 | p    |
| <b><i>Risk factors</i></b> |                  |              |      |                    |                     |      |
| Sex, female                | 1.6(1.09-2.5)    | 2.0(1.1-4.5) | 0.11 | 333.5(213.2-684.9) | 346.6(237.3-646.2)  | 0.67 |
| Hypertension               | 1.7(1.09-2.7)    | 1.8(1.2-3.3) | 0.48 | 314.8(206.8-535.7) | 387.2(226.8-682.4)  | 0.35 |
| Diabetes Mellitus          | 1.7(1.1-2.6)     | 2.7(1.4-4.1) | 0.14 | 329.9(213.0-646.2) | 398.8(267.1-681.6)  | 0.57 |
| Dyslipidemia               | 2.3(1.2-4.0)     | 1.6(1.0-2.9) | 0.10 | 389.6(220.4-744.2) | 325.1(213.4-633.7)  | 0.43 |
| Smoking                    | 1.7(1.1-3.2)     | 2.0(1.2-5.0) | 0.59 | 329.9(213.4-621.2) | 925.9(275.7-1373.2) | 0.21 |
| Cardiopathy                | 1.7(1.07-2.4)    | 2.3(1.3-3.7) | 0.09 | 323.0(212.9-649.4) | 378.2(267.1-777.3)  | 0.21 |
| Atrial fibrillation        | 1.7(1.0-2.6)     | 2.0(1.4-4.1) | 0.12 | 329.6(203.2-633.7) | 559.4(298.4-891.4)  | 0.02 |
| Previous IS                | 1.7(1.2-2.7)     | 2.6(1.3-4.7) | 0.09 | 338.1(214.4-669.1) | 349.0(231.9-527.2)  | 0.77 |
| <b><i>Therapies</i></b>    |                  |              |      |                    |                     |      |
| Peripheral arteriopathy    | 1.7(1.1-3.2)     | 1.7(1.4-3.2) | 0.99 | 343.7(213.8-651.0) | 326.3(234.2-517.2)  | 0.73 |
| Antiplatelet therapy       | 1.7(1.0-3.0)     | 1.7(1.4-3.5) | 0.39 | 346.6(237.3-662.8) | 335.3(203.2-554.8)  | 0.27 |
| Anticoagulant therapy      | 1.7(1.0-3.0)     | 1.7(1.4-3.5) | 0.44 | 329.9(209.0-633.3) | 554.7(257.2-1080.5) | 0.08 |
| Statins                    | 2.0(1.2-3.7)     | 1.6(1.0-2.6) | 0.09 | 357.1(246.0-738.1) | 327.3(212.4-639.9)  | 0.23 |
| Fibrinolytic therapy (tPA) | 1.7(1.0-2.7)     | 1.7(1.3-3.2) | 0.28 | 340.9(226.0-632.3) | 338(203.6-679.1)    | 0.94 |

|                                   |              |              |      |                    |                    |      |
|-----------------------------------|--------------|--------------|------|--------------------|--------------------|------|
| Successful recanalization         | 1.6(1.2-1.9) | 1.7(1.1-3.0) | 0.47 | 546.2(226.1-667.0) | 335.4(213.8-651.0) | 0.86 |
| <i>Hemorrhagic transformation</i> | 1.8(1.1-2.8) | 1.7(1.1-4.0) | 0.74 | 340.9(237.9-650.3) | 346.6(212.7-652.6) | 0.86 |
| <i>Baseline NIHSS</i>             |              |              |      |                    |                    |      |
| Minor Stroke (<7)                 | NA           | 1.3(0.9-6.4) |      | 293.5(143.7-403.1) | NA                 |      |
| Moderate (7-14)                   | NA           | 1.8(1.4-2.4) | 0.98 | 323.7(201.7-651.0) | NA                 | 0.15 |
| Severe (>14)                      | NA           | 1.7(1.0-3.9) |      | 430.1(280.7-723.2) | NA                 |      |
| <i>Three-months outcomes n(%)</i> |              |              |      |                    |                    |      |
| 3-month mortality                 | 1.7(1.1-3.1) | 2.1(1.5-2.8) | 0.42 | 327.5(212.9-646.2) | 482.6(313.9-897.2) | 0.19 |
| Functional dependence             | 1.6(1.1-3.0) | 2.0(1.4-3.1) | 0.21 | 327.2(204.4-620.5) | 478.4(304.0-779.7) | 0.03 |

Values presented as median and IQR. NA: not applicable. The comparisons were made using Mann-Whitney U or Kruskal Wallis test for NECTIN-2 and student t test or ANOVA for log transformed values of IGFBP-2.

**Table S4.** Univariate and multivariate logistic regression models for IS etiology (CE and ESUS, n=61 vs AT, n=17) and categorized IGFBP-2 (cut-off >247.6 ng/mL).

| Variable    | Univariate     |       | Multivariate model 1 |       | Multivariate model 2 |       |
|-------------|----------------|-------|----------------------|-------|----------------------|-------|
|             | OR (95%CI)     | p     | OR (95%CI)           | p     | OR (95%CI)           | p     |
| IGFBP-2     | 5.5 (1.7-16.8) | 0.003 | 9.5(2.13-42.54)      | 0.003 | 8.7(1.84-41.13)      | 0.003 |
| Age, years  |                |       | 1.0(0.98-1.09)       | 0.200 | 1.0(0.98-1.09)       | 0.208 |
| Sex, female |                |       | 15.3(2.71-87.34)     | 0.002 | 14.6(2.55-83.62)     | 0.003 |
| NIHSS       |                |       |                      |       | 1.0(0.88-1.09)       | 0.704 |

OR= Odds ratio; CI= confidence interval; NIHSS= National Institutes of Health Stroke Scale.

**Table S5:** Demographic and clinical characteristics of hypertensive patients with and without atrial fibrillation (AF).

| Patient's characteristics | Hypertensive patients without AF<br>n=20 | Hypertensive patients with AF<br>n=78 |
|---------------------------|------------------------------------------|---------------------------------------|
| Age, years                | 58.0 (53.3-60.8)                         | 68.0 (60.0-73.0)                      |
| Sex, female               | 11 (55)                                  | 20 (25.6)                             |
| Dyslipidemia              | 12 (60.0)                                | 45 (57.7)                             |
| Diabetes                  | 0 (0.0)                                  | 10 (12.8)                             |
| Cardiopathy               | 0 (0.0)                                  | 4 (5.1)                               |
| Anticoagulant Therapy     | 0 (0.0)                                  | 70 (89.7)                             |

Continuous data presented as median (IQR). Categorical data are presented as number (percentage).

**Table S6.** Association of thrombi IGFBP-2 expression and clinical characteristics in patients with IS (n=23).

|                                     | % of IGFBP-2 area/ total area |              |       |
|-------------------------------------|-------------------------------|--------------|-------|
| Patient's characteristics           | No                            | Yes          | p     |
| <b><i>Risk factors</i></b>          |                               |              |       |
| Sex, female                         | 3.3(2.8-3.7)                  | 4.3(3.1-6.4) | 0.35  |
| Hypertension                        | 5.1(3.6-8.6)                  | 3.0(2.2-3.4) | 0.009 |
| Diabetes Mellitus                   | 3.7(2.8-5.7)                  | 3.1(3.0-3.3) | 0.58  |
| Dyslipidemia                        | 4.1(2.4-6.6)                  | 3.3(2.9-5.2) | 0.94  |
| Smoking                             | 3.4(2.7-4.7)                  | 3.7(3.3-4.1) | 0.88  |
| <b><i>Therapies</i></b>             |                               |              |       |
| Antiplatelet therapy                | 3.9(3.1-6.4)                  | 3.0(2.9-3.1) | 0.31  |
| Anticoagulant therapy               | 3.3(2.8-3.7)                  | 8.6(8.5-8.8) | 0.03  |
| Statins                             | 4.1(3.3-5.7)                  | 3.2(2.7-4.7) | 0.23  |
| <b><i>Baseline NIHSS</i></b>        |                               |              |       |
| Moderate (7-14)                     | NA                            | 3.4(3.2-4.5) | 0.68  |
| Severe (>14)                        | NA                            | 3.3(2.8-4.1) |       |
| Successful recanalization           | NA                            | 3.5(2.9-5.4) | NA    |
| <b><i>Three-months outcomes</i></b> |                               |              |       |
| 3-month mortality                   | 3.9(3.4-5.1)                  | 3.1(2.4-5.9) | 0.05  |
| Functional dependence               | 3.7(3.1-4.7)                  | 3.7(2.4-8.6) | 0.70  |

Data are presented as median (IQR). NA: not applicable. The comparisons were made using Mann-Whitney U test.

## Supplementary Figures

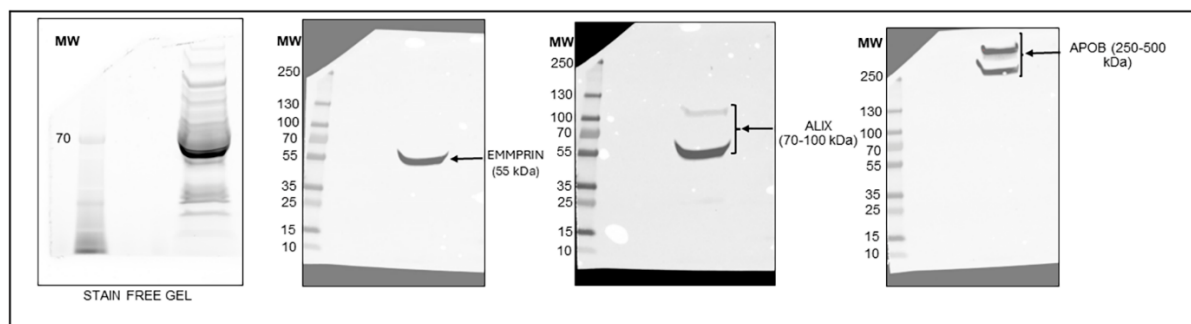

**Figure S1:** Western blot for the EVs markers EMMPRIN and ALIX, and plasma contaminant (APOB100) in EVs from plasma.

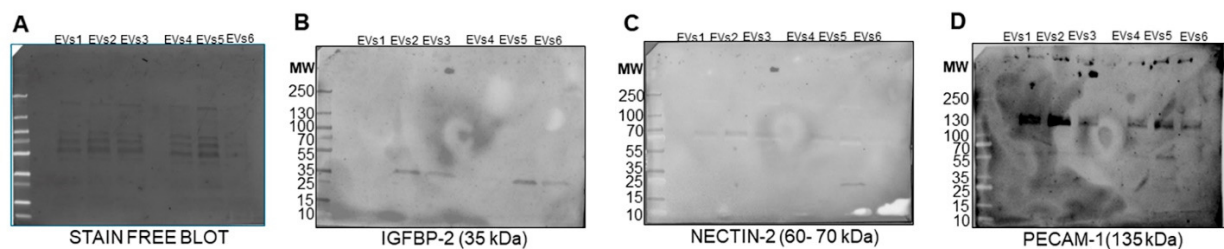

**Figure S2:** Western blot of plasma EVs from IS patients (n=3 AT and 3 CE) showing selected candidates and their expected molecular weights (MW). EVs 1 to 3 are from AT patients and 4 to 6 are from CE patients.

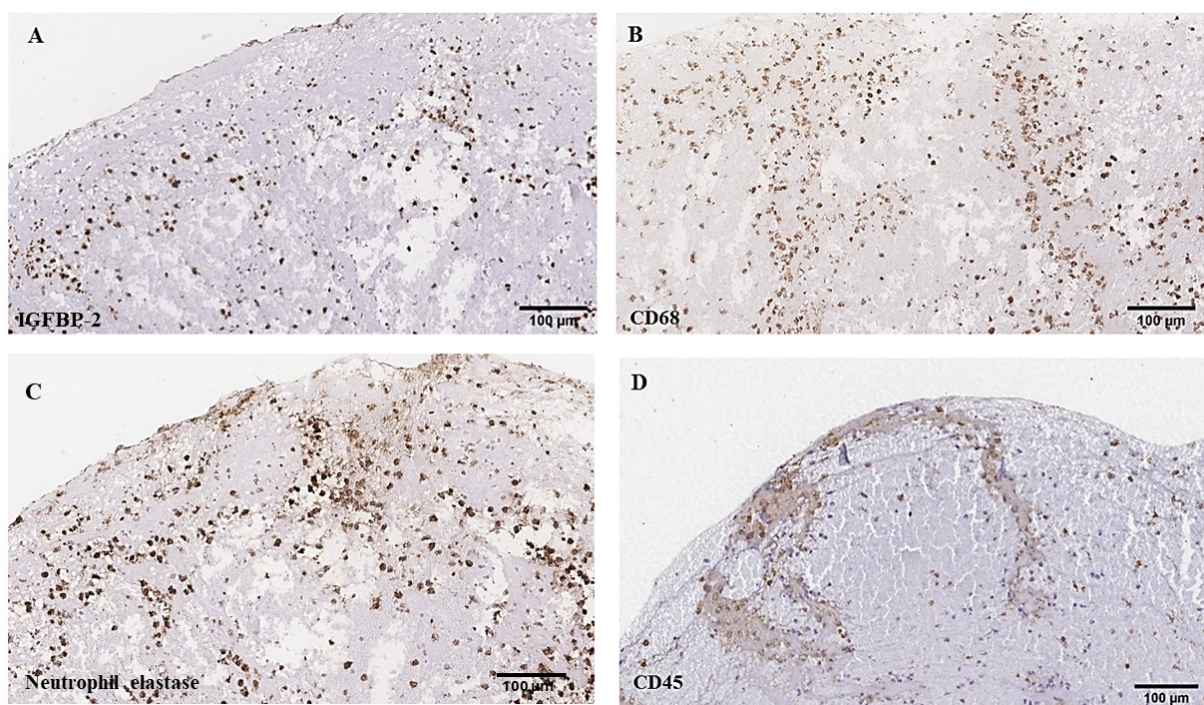



**Figure S3:** Representative serial images of CE thrombus immunostained for IGFBP-2 (A), CD68 - labelling macrophages (B), Neutrophil Elastase - labelling neutrophils (C), and CD45 - labelling leukocytes (D). Scale bars represent 100  $\mu$ m.

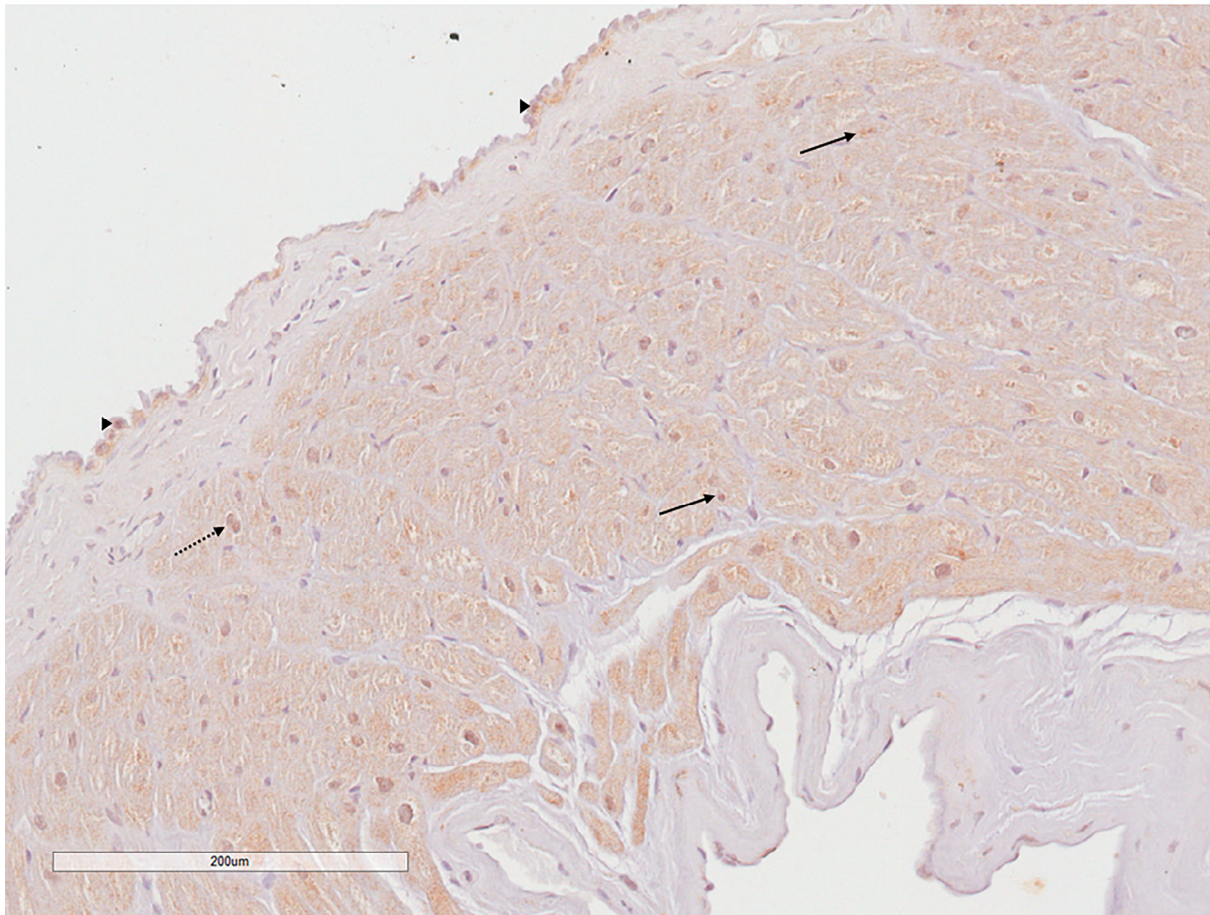

**Figure S4:** Immunostaining of IGFBP-2, in the left atrium of patient with AF. IGFBP-2 was found mostly in cardiomyocytes (arrow), in endothelial (dotted arrow), and mesothelial (arrowhead) cells. Scale bar represent 200  $\mu$ m.
